# Supplementary material
Source: publisher figshare collection journal article supplement (https://tandf.figshare.com/articles/dataset/_/5354092)

**A**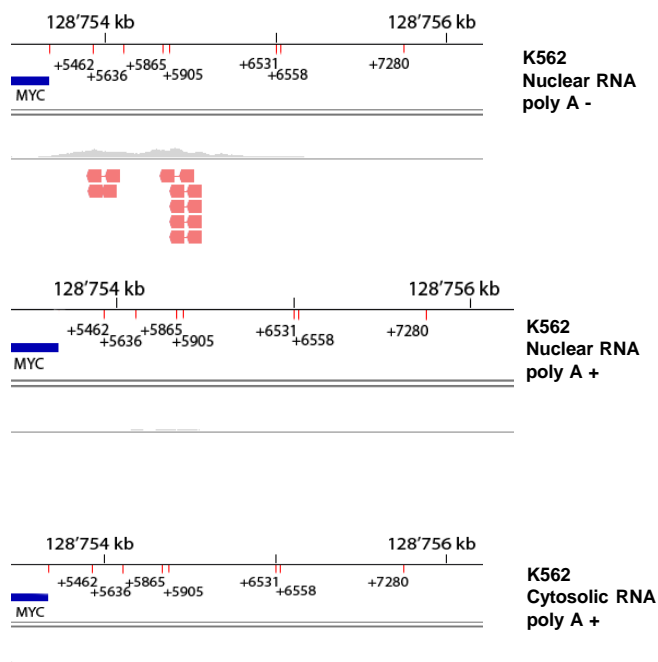**B**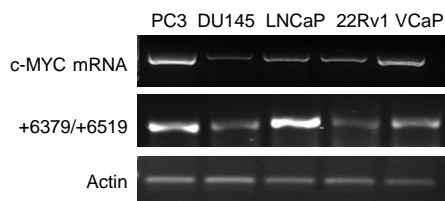

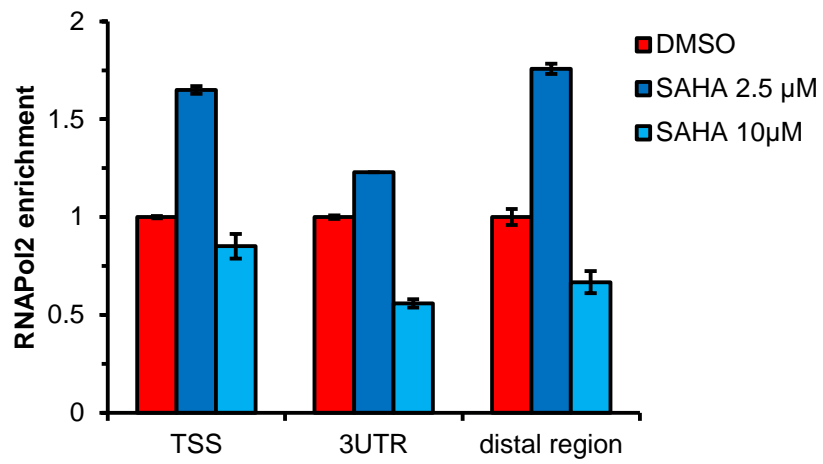

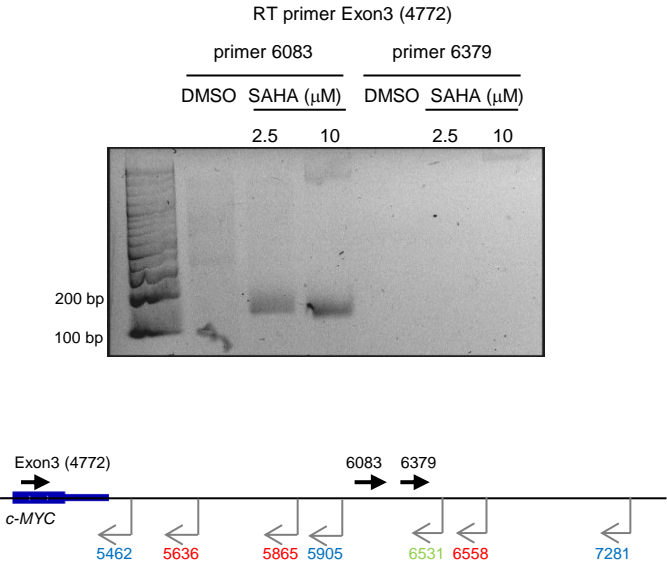

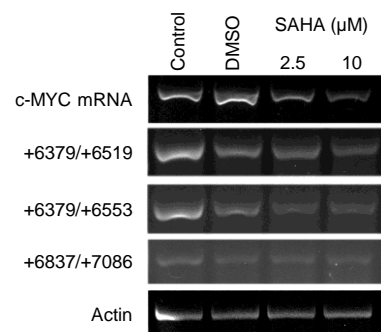

sRNA5 (miRNA) 5'-AGUGAAUCUUGGGCAUG-3'

# PROMOTER

## Site 6

|        |     |       |        |   |     |
|--------|-----|-------|--------|---|-----|
| 5'→3'  |     | U     | CCCCG  | G |     |
| Target | 150 | UGCUC | GUUUGC |   | 165 |
|        |     |       |        |   |     |
| miRNA  | 17  | ACGGG | UAAGUG |   | 1   |
| 3'→5'  |     | GU    | UUC    | A |     |

## Site 9

|        |     |      |         |    |     |
|--------|-----|------|---------|----|-----|
| 5'→3'  |     | A    | AUC     | G  |     |
| Target | 219 | GUGC | GGAUUUG |    | 232 |
|        |     |      |         |    |     |
| miRNA  | 17  | UACG | UCUAAGU |    | 1   |
| 3'→5'  |     | G    | GGU     | GA |     |

## Site 10

|        |     |     |         |   |     |
|--------|-----|-----|---------|---|-----|
| 5'→3'  |     | A   | ACUAU   | U |     |
| Target | 236 | GCU | AUUCACU |   | 250 |
|        |     |     |         |   |     |
| miRNA  | 17  | CGG | UAAGUGA |   | 1   |
| 3'→5'  |     | GUA | GUUC    |   |     |

## Site 17

|        |     |     |      |        |     |
|--------|-----|-----|------|--------|-----|
| 5'→3'  |     | U   | AAUA | C      | G   |
| Target | 567 | GUG | CA   | GUUUGC | 582 |
|        |     |     |      |        |     |
| miRNA  | 17  | UAC | GU   | UAAGUG | 1   |
| 3'→5'  |     | G   | GG   | UC     | A   |

## Site 23

|        |     |      |        |    |     |
|--------|-----|------|--------|----|-----|
| 5'→3'  |     | C    |        | U  |     |
| Target | 818 | GUCC | GGUUUG |    | 827 |
|        |     |      |        |    |     |
| miRNA  | 17  | CGGG | CUAAGU |    | 1   |
| 3'→5'  |     | GUA  | UU     | GA |     |

## Site 43

|        |      |       |         |   |      |
|--------|------|-------|---------|---|------|
| 5'→3'  |      | C     | CGAU    | A |      |
| Target | 1660 | GCCUG | GAUUUAU |   | 1675 |
|        |      |       |         |   |      |
| miRNA  | 17   | CGGGU | CUAAGUG |   | 1    |
| 3'→5'  |      | GUA   | U       | A |      |

# INTRON 1

## Site 66

|        |      |       |         |   |      |
|--------|------|-------|---------|---|------|
| 5'→3'  |      | U     | UUUA    | U |      |
| Target | 2575 | UGCCU | AUUUAU  |   | 2590 |
|        |      |       |         |   |      |
| miRNA  | 17   | ACGGG | UAAGUGA |   | 1    |
| 3'→5'  |      | GU    | UUC     |   |      |

## Site 70

|        |      |       |         |   |      |
|--------|------|-------|---------|---|------|
| 5'→3'  |      | C     | UAUGAAU | G |      |
| Target | 2811 | UGCCU | AUUCAC  |   | 2830 |
|        |      |       |         |   |      |
| miRNA  | 17   | ACGGG | UAAGUG  |   | 1    |
| 3'→5'  |      | GU    | UUC     | A |      |

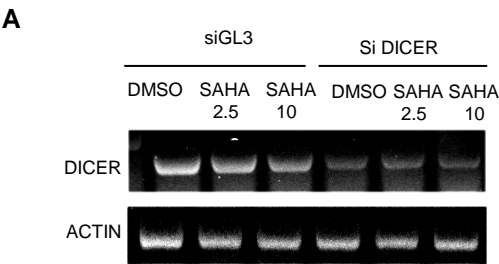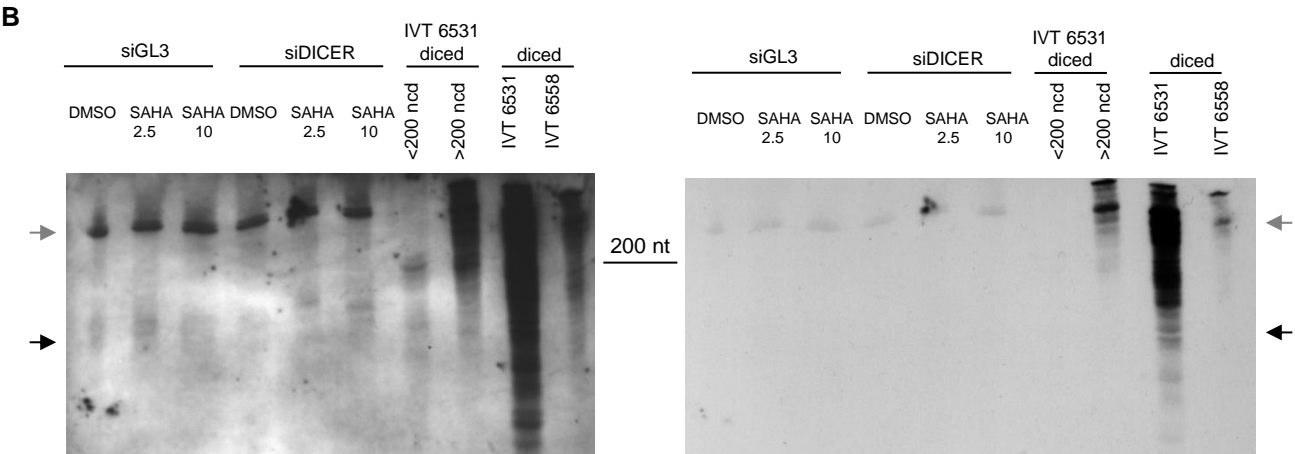

12% denaturing PAGE  
5866-6558 RNA probe

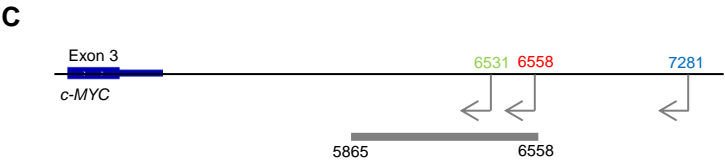

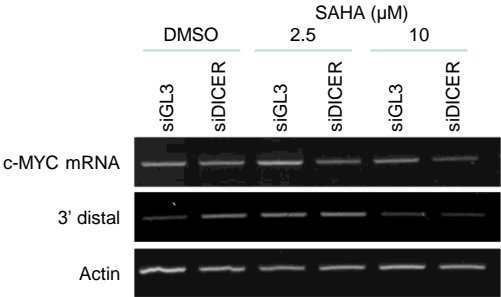

Supplement: Supplementary file 5 [file 1]
