# Supplementary material
Source: publisher figshare collection journal article supplement (https://tandf.figshare.com/articles/dataset/_/5354092)
Supplement: Supplementary file 2 [file 1]

**Supplementary Table 2 - GRO-Seq data sets**

| Cell line                    | Dataset series                                    | Reference                                                                                                                                                                                                                                                                                  |
|------------------------------|---------------------------------------------------|--------------------------------------------------------------------------------------------------------------------------------------------------------------------------------------------------------------------------------------------------------------------------------------------|
| AC16                         | GSE41323                                          | Danko CG, Hah N, Luo X, Martins AL et al. Signaling pathways differentially affect RNA polymerase II initiation, pausing, and elongation rate in cells. <i>Mol Cell</i> 2013 Apr 25;50(2):212-22. PMID: 23523369                                                                           |
| Hela_danko                   | GSE62046                                          | Andersson R, Refsing Andersen P, Valen E, Core LJ et al. Nuclear stability and transcriptional directionality separate functionally distinct RNA species. <i>Nat Commun</i> 2014 Nov 12;5:5336. PMID: 25387874                                                                             |
| Hela_laitem                  | E-MTAB-3360                                       | Laitem C, Zaborowska J, Isa NF, Kufs J, Dienstbier M, Murphy S. CDK9 inhibitors define elongation checkpoints at both ends of RNA polymerase II-transcribed genes. <i>Nat Struct Mol Biol</i> . 2015 May;22(5):396-403. doi: 10.1038/nsmb.3000. Epub 2015 Apr 6. PMID:25849141             |
| Hela_duttke                  | GSE63872                                          | Duttke SH, Lacadie SA, Ibrahim MM, Glass CK et al. Human promoters are intrinsically directional. <i>Mol Cell</i> 2015 Feb 19;57(4):674-84. PMID: 25639469                                                                                                                                 |
| IMR90                        | GSE13518                                          | Core LJ, Waterfall JJ, Lis JT. Nascent RNA sequencing reveals widespread pausing and divergent initiation at human promoters. <i>Science</i> 2008 Dec 19;322(5909):1845-8. PMID: 19056941                                                                                                  |
| LNCaP                        | GSE 47807                                         | Yang et al. Yang L, Lin C, Jin C, Yang JC, Tanasa B, Li W, Merkurjev D, Ohgi KA, Meng D, Zhang J, Evans CP, Rosenfeld MG. <i>Nature</i> . 2013 Aug 29;500(7464):598-602.doi:10.1038/nature12451.Epub 2013 Aug 14.PMID: 23945587                                                            |
| LNCaP                        | GSE27823                                          | Wang D, Garcia-Bassets I, Benner C, Li W et al. Reprogramming transcription by distinct classes of enhancers functionally defined by eRNA. <i>Nature</i> 2011 May 15;474(7351):390-4. PMID: 21572438                                                                                       |
| K562                         | GSE66448                                          | Niskanen EA, Malinen M, Sutinen P, Toropainen S et al. Global SUMOylation on active chromatin is an acute heat stress response restricting transcription. <i>Genome Biol</i> 2015 Jul 28;16:153. PMID: 26259101                                                                            |
| BT474, MCF10, SKBR3, ZR75-30 | E-MTAB-666, E-MTAB-667, E-MTAB-668 and E-MTAB-675 | Kim YJ, Greer CB, Cecchini KR, Harris LN, Tuck DP, Kim TH. HDAC inhibitors induce transcriptional repression of high copy number genes in breast cancer through elongation blockade. <i>Oncogene</i> . 2013 Jun 6;32(23):2828-35. doi: 10.1038/onc.2013.32. Epub 2013 Feb 25.PMID:23435418 |
| GM12004, GM12750             | GSE39878                                          | Wang IX, Core LJ, Kwak H, Brady L et al. RNA-DNA differences are generated in human cells within seconds after RNA exits polymerase II. <i>Cell Rep</i> 2014 Mar 13;6(5):906-15. PMID: 24561252                                                                                            |
| h1ESC                        | GSE41009                                          | Sigova AA, Mullen AC, Molinie B, Gupta S et al. Divergent transcription of long noncoding RNA/mRNA gene pairs in embryonic stem cells. <i>Proc Natl Acad Sci U S A</i> 2013 Feb 19;110(8):2876-81. PMID: 23382218                                                                          |
| HCT116 p53 +/+, p53 -/-      | GSE53964                                          | Allen MA, Andrysik Z, Dengler VL, Mellert HS et al. Global analysis of p53-regulated transcription identifies its direct targets and unexpected regulatory mechanisms. <i>Elife</i> 2014 May 27;3:e02200. PMID: 24867637                                                                   |
| MCF7                         | GSE45822                                          | Li W, Notani D, Ma Q, Tanasa B et al. Functional roles of enhancer RNAs for oestrogen-dependent transcriptional activation. <i>Nature</i> 2013 Jun 27;498(7455):516-20. PMID: 23728302                                                                                                     |
