# Supplementary material
Source: publisher figshare collection journal article supplement (https://tandf.figshare.com/articles/dataset/_/5354092)
Supplement: Supplementary file 3 [file 1]

**Supplementary Table 1 - Primer sets**

| Primer name           | Primer sequence                                   | Application  |
|-----------------------|---------------------------------------------------|--------------|
| Myc exon1 +100 Fw     | ggagatccggagcgaatag                               | RT-PCR       |
| Myc intron1+463 Rev   | gcattcgactcatctcagca                              | RT-PCR       |
| MYC exon2 +2202 Rev   | cagctcgaatttcttccagata                            | RT-PCR       |
| MYC exon 3 +4772 Fw   | tgtcctgagcaatcacctatg                             | RT-PCR, RACE |
| MYC 3'UTR +5374 Fw    | aagatgcttcttgagactatga                            | RT-PCR, RACE |
| MYC 3'UTR +5526 Rev   | cccaactcccagtccttat                               | RT-PCR       |
| Myc +5430 Fw          | aggcaggtgagaaggtgaga                              | RACE         |
| Myc +6083 Fw          | gggaaaagtgaagcgagat                               | RACE         |
| Myc+6130 Fw           | ctgtccaagccacctca                                 | RACE         |
| Myc +6379 Fw          | ctgggaagaagccagttcag                              | RT-PCR, RACE |
| Myc +6519 Rev         | tcaaggactcaggatgagca                              | RT-PCR       |
| T7 prom +as 6531 rev  | gcgtaatacgactcactatagggagaaaaaaccttttcaaggac      | IVT          |
| T7 prom +as 6558 rev  | gcgtaatacgactcactatagggagataggtttcagaggcttat      | IVT          |
| T7 prom +myc 5866 Fw  | gcgtaatacgactcactatagggagagtctaattgtgctgagatcaaga | IVT          |
| T7 prom +myc 5906 Fw  | gcgtaatacgactcactatagggagaaacagactcaagtcataacaatg | IVT          |
| T7 prom +myc 6060 Fw  | gcgtaatacgactcactatagggagacacatgcccaagattcactgat  | IVT          |
| T7 prom +myc 5930 Fw1 | gcgtaatacgactcactatagggagaaagctctatttgtgtccaagc   | IVT          |
| T7 prom +myc 6086 Fw  | gcgtaatacgactcactatagggagagaaaagtgaagcgagatttg    | IVT          |
| myc +6113 rev         | ctgggttcaaatctcgcttc                              | IVT          |
| myc +6256 Rev         | ggggaactgatgcctgac                                | IVT          |
| As 5866 Fw            | gtctaattgtgctgagatcaaga                           | IVT, RT-PCR  |
| As 5906 Fw            | acagactcaagtcataacaatg                            | IVT, RT-PCR  |
| As 6060 Fw            | cacatgcccaagattcactgat                            | RT-PCR       |
| As 6531 Rev           | aaaaataccttttcaaggac                              | RT-PCR       |
| As 6558 Rev           | taggttttcagaggcttat                               | RT-PCR       |
| Myc exon2 qPCR Fw     | ggtgctccatgaggagaca                               | qRT PCR      |
| Myc exon 3 qPCR Rev   | cctgcctctttccacagaa                               | qRT PCR      |
| ACTB+832 Fw 1         | attggcaatgagcggttc                                | qRT PCR      |
| ACTB +907 Rev 1       | ggatgccacaggactccat                               | qRT PCR      |
