# Supplementary material
Source: publisher figshare collection journal article supplement (https://tandf.figshare.com/articles/dataset/_/5354092)
Supplement: Supplementary file 4 [file 1]

## **Supplementary Information**

**This file includes:**

**Supplementary Figure Legends**

**Supplementary Figures 1-7**

**Supplementary Tables 1-3**

## **SUPPLEMENTARY FIGURE LEGENDS**

### **Supplementary Figure 1. Antisense transcription in the human C-MYC locus. (A)**

Antisense reads in polyA-depleted (top), polyA-enriched (middle) nuclear RNA and polyA-enriched cytosolic RNA (bottom) in the c-MYC 3' distal region in K562 cells detected by RNA-Seq. **(B)** Levels of c-MYC mRNA and antisense transcripts in human prostate cancer cell lines determined by RT-PCR and strand-specific RT-PCR, respectively.

### **Supplementary Figure 2. RNA Polymerase 2 (RNAPol2) occupancy within the c-MYC locus.**

RNAPol2 binding was determined by chromatin immunoprecipitation in PC3 cells incubated with vehicle (DMSO) or SAHA (2.5-10  $\mu$ M) for 6 h. Data are presented as fold enrichment relative to input DNA.

### **Supplementary Figure 3. 5' extension of antisense transcripts in the c-MYC 3' UTR.**

5'RACE was performed with the indicated primers starting from position +4772 in the c-MYC exon 3.

**Supplementary Figure 4. c-MYC mRNA and antisense transcripts in immortalized normal prostate epithelial cells.** Cells were incubated in culture medium (control) or treated with vehicle (DMSO) or SAHA (2.5-10  $\mu$ M).

**Supplementary Figure 5. Putative binding sequence of NAT6531-derived sRNA5 in the c-MYC locus.** Matching miRNA-like binding sites for sRNA5 (top panel) were predicted searching within the c-MYC locus using StarMiR. Four sites (three in the promoter region and one in intron 1) of the top sites with best fit to canonical miRNA binding mode are shown.

**Supplementary Figure 6. Dicer knockdown efficiency and production of endogenous small RNA in PC3 cells.** (A) Level of Dicer mRNA in PC3 cells transfected with siGL3 or siDicer. (B) Northern blot analysis of long and small RNAs in PC3 cells after depletion of Dicer for 72 h and treatment with SAHA for 6 h. Left and right panels show a longer and shorter exposure, respectively, of the same blot after hybridization with RNA probe 5866-6558. *In vitro* transcribed (IVT) NAT6531 or NAT6558 after Dicer digestion were loaded in parallel as reference along with Dicer digested NAT6531 after fractionation in short (<200 nt) and long (>200 nt) RNA. Gray and black arrows indicate the position of long NATs and small RNAs, respectively. (C) Position of RNA probe 5865-6558 respect to antisense transcripts.

**Supplementary Figure 7. c-MYC mRNA levels in Dicer depleted PC3 cells.** c-MYC mRNA and antisense transcripts in PC3 cells incubated with control (siGL3) and Dicer targeting (siDicer) siRNA were determined by RT-PCR and strand-specific RT-PCR, respectively.

**A**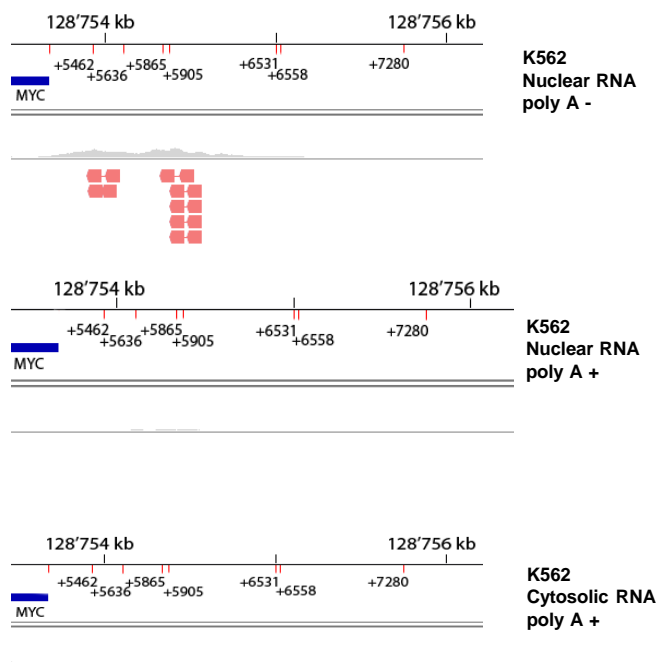**B**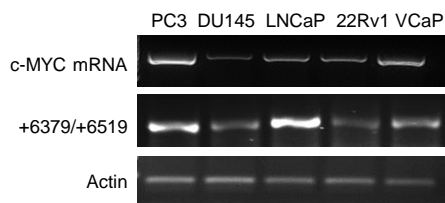

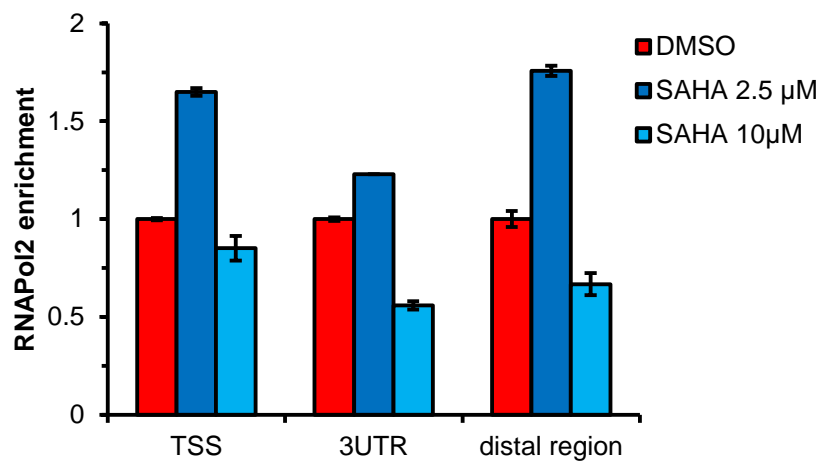

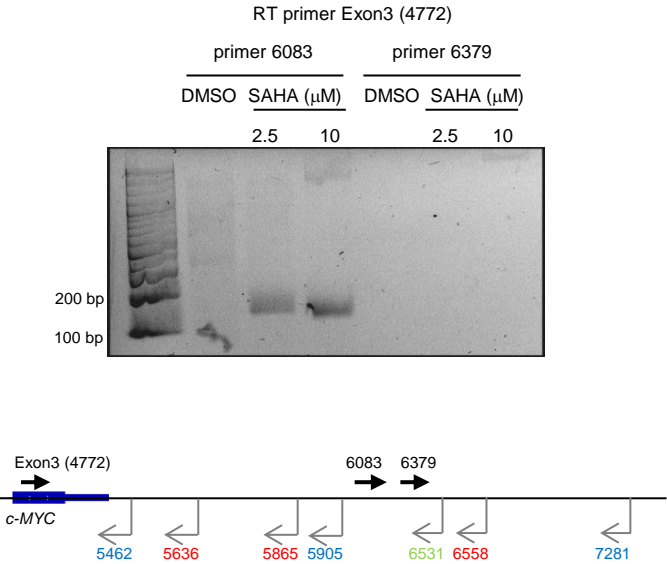

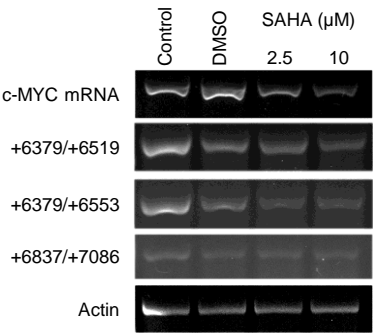

sRNA5 (miRNA) 5'-AGUGAAUCUUGGGCAUG-3'

# PROMOTER

## Site 6

|        |     |       |        |   |     |
|--------|-----|-------|--------|---|-----|
| 5'→3'  |     | U     | CCCCG  | G |     |
| Target | 150 | UGCUC | GUUUGC |   | 165 |
|        |     |       |        |   |     |
| miRNA  | 17  | ACGGG | UAAGUG |   | 1   |
| 3'→5'  |     | GU    | UUC    | A |     |

## Site 9

|        |     |      |         |    |     |
|--------|-----|------|---------|----|-----|
| 5'→3'  |     | A    | AUC     | G  |     |
| Target | 219 | GUGC | GGAUUUG |    | 232 |
|        |     |      |         |    |     |
| miRNA  | 17  | UACG | UCUAAGU |    | 1   |
| 3'→5'  |     | G    | GGU     | GA |     |

## Site 10

|        |     |     |         |   |     |
|--------|-----|-----|---------|---|-----|
| 5'→3'  |     | A   | ACUAU   | U |     |
| Target | 236 | GCU | AUUCACU |   | 250 |
|        |     |     |         |   |     |
| miRNA  | 17  | CGG | UAAGUGA |   | 1   |
| 3'→5'  |     | GUA | GUUC    |   |     |

## Site 17

|        |     |     |      |        |     |
|--------|-----|-----|------|--------|-----|
| 5'→3'  |     | U   | AAUA | C      | G   |
| Target | 567 | GUG | CA   | GUUUGC | 582 |
|        |     |     |      |        |     |
| miRNA  | 17  | UAC | GU   | UAAGUG | 1   |
| 3'→5'  |     | G   | GG   | UC     | A   |

## Site 23

|        |     |      |        |    |     |
|--------|-----|------|--------|----|-----|
| 5'→3'  |     | C    |        | U  |     |
| Target | 818 | GUCC | GGUUUG |    | 827 |
|        |     |      |        |    |     |
| miRNA  | 17  | CGGG | CUAAGU |    | 1   |
| 3'→5'  |     | GUA  | UU     | GA |     |

## Site 43

|        |      |       |         |   |      |
|--------|------|-------|---------|---|------|
| 5'→3'  |      | C     | CGAU    | A |      |
| Target | 1660 | GCCUG | GAUUUAU |   | 1675 |
|        |      |       |         |   |      |
| miRNA  | 17   | CGGGU | CUAAGUG |   | 1    |
| 3'→5'  |      | GUA   | U       | A |      |

# INTRON 1

## Site 66

|        |      |       |         |   |      |
|--------|------|-------|---------|---|------|
| 5'→3'  |      | U     | UUUA    | U |      |
| Target | 2575 | UGCCU | AUUUAUU |   | 2590 |
|        |      |       |         |   |      |
| miRNA  | 17   | ACGGG | UAAGUGA |   | 1    |
| 3'→5'  |      | GU    | UUC     |   |      |

## Site 70

|        |      |       |         |   |      |
|--------|------|-------|---------|---|------|
| 5'→3'  |      | C     | UAUGAAU | G |      |
| Target | 2811 | UGCCU | AUUCAC  |   | 2830 |
|        |      |       |         |   |      |
| miRNA  | 17   | ACGGG | UAAGUG  |   | 1    |
| 3'→5'  |      | GU    | UUC     | A |      |



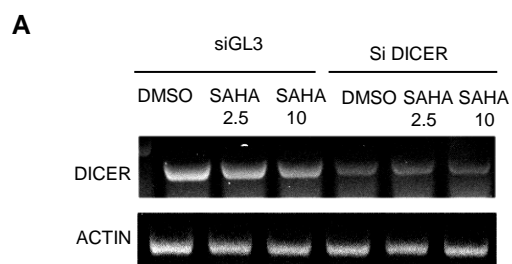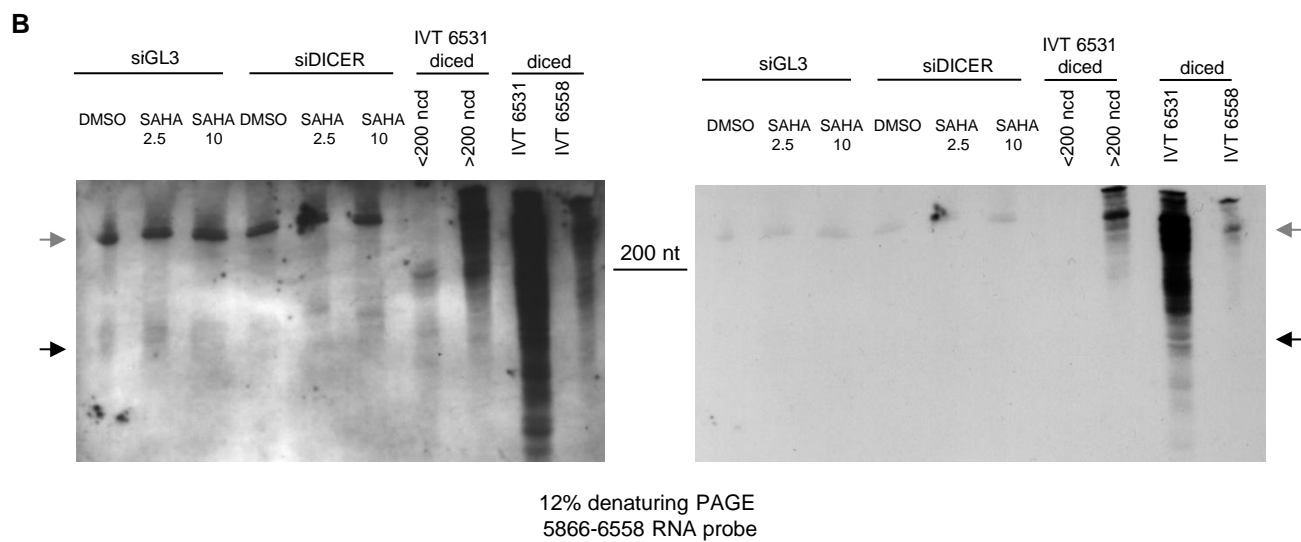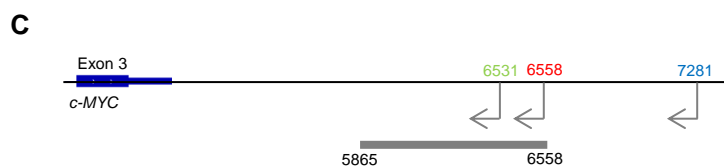

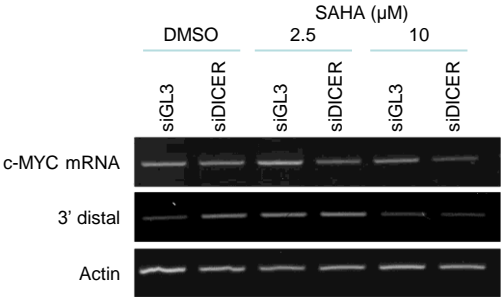

**Supplementary Table 1 - Primer sets**

| Primer name           | Primer sequence                                   | Application  |
|-----------------------|---------------------------------------------------|--------------|
| Myc exon1 +100 Fw     | ggagatccggagcgaatag                               | RT-PCR       |
| Myc intron1+463 Rev   | gcattcgactcatctcagca                              | RT-PCR       |
| MYC exon2 +2202 Rev   | cagctcgaatttcttccagata                            | RT-PCR       |
| MYC exon 3 +4772 Fw   | tgtcctgagcaatcacctatg                             | RT-PCR, RACE |
| MYC 3'UTR +5374 Fw    | aagatgcttcttgagactatga                            | RT-PCR, RACE |
| MYC 3'UTR +5526 Rev   | cccaactcccagtccttat                               | RT-PCR       |
| Myc +5430 Fw          | aggcaggtgagaaggtgaga                              | RACE         |
| Myc +6083 Fw          | gggaaaagtgaagcgagat                               | RACE         |
| Myc+6130 Fw           | ctgtccaagccacctca                                 | RACE         |
| Myc +6379 Fw          | ctgggaagaagccagttcag                              | RT-PCR, RACE |
| Myc +6519 Rev         | tcaaggactcaggatgagca                              | RT-PCR       |
| T7 prom +as 6531 rev  | gcgtaatacgactcactatagggagaaaaaaccttttcaaggac      | IVT          |
| T7 prom +as 6558 rev  | gcgtaatacgactcactatagggagataggtttcagaggcttat      | IVT          |
| T7 prom +myc 5866 Fw  | gcgtaatacgactcactatagggagagtctaattgtgctgagatcaaga | IVT          |
| T7 prom +myc 5906 Fw  | gcgtaatacgactcactatagggagaaacagactcaagtcataacaatg | IVT          |
| T7 prom +myc 6060 Fw  | gcgtaatacgactcactatagggagacacatgcccaagattcactgat  | IVT          |
| T7 prom +myc 5930 Fw1 | gcgtaatacgactcactatagggagaaagctctatttgtgtccaagc   | IVT          |
| T7 prom +myc 6086 Fw  | gcgtaatacgactcactatagggagagaaaagtgaagcgagatttg    | IVT          |
| myc +6113 rev         | ctgggttcaaatctcgcttc                              | IVT          |
| myc +6256 Rev         | ggggaactgatgcctgac                                | IVT          |
| As 5866 Fw            | gtctaattgtgctgagatcaaga                           | IVT, RT-PCR  |
| As 5906 Fw            | acagactcaagtcataacaatg                            | IVT, RT-PCR  |
| As 6060 Fw            | cacatgcccaagattcactgat                            | RT-PCR       |
| As 6531 Rev           | aaaaataccttttcaaggac                              | RT-PCR       |
| As 6558 Rev           | taggttttcagaggcttat                               | RT-PCR       |
| Myc exon2 qPCR Fw     | ggtgctccatgaggagaca                               | qRT PCR      |
| Myc exon 3 qPCR Rev   | cctgcctctttccacagaa                               | qRT PCR      |
| ACTB+832 Fw 1         | attggcaatgagcggttc                                | qRT PCR      |
| ACTB +907 Rev 1       | ggatgccacaggactccat                               | qRT PCR      |

**Supplementary Table 2 - GRO-Seq data sets**

| Cell line                    | Dataset series                                    | Reference                                                                                                                                                                                                                                                                                  |
|------------------------------|---------------------------------------------------|--------------------------------------------------------------------------------------------------------------------------------------------------------------------------------------------------------------------------------------------------------------------------------------------|
| AC16                         | GSE41323                                          | Danko CG, Hah N, Luo X, Martins AL et al. Signaling pathways differentially affect RNA polymerase II initiation, pausing, and elongation rate in cells. <i>Mol Cell</i> 2013 Apr 25;50(2):212-22. PMID: 23523369                                                                           |
| Hela_danko                   | GSE62046                                          | Andersson R, Refsing Andersen P, Valen E, Core LJ et al. Nuclear stability and transcriptional directionality separate functionally distinct RNA species. <i>Nat Commun</i> 2014 Nov 12;5:5336. PMID: 25387874                                                                             |
| Hela_laitem                  | E-MTAB-3360                                       | Laitem C, Zaborowska J, Isa NF, Kufs J, Dienstbier M, Murphy S. CDK9 inhibitors define elongation checkpoints at both ends of RNA polymerase II-transcribed genes. <i>Nat Struct Mol Biol</i> . 2015 May;22(5):396-403. doi: 10.1038/nsmb.3000. Epub 2015 Apr 6. PMID:25849141             |
| Hela_duttke                  | GSE63872                                          | Duttke SH, Lacadie SA, Ibrahim MM, Glass CK et al. Human promoters are intrinsically directional. <i>Mol Cell</i> 2015 Feb 19;57(4):674-84. PMID: 25639469                                                                                                                                 |
| IMR90                        | GSE13518                                          | Core LJ, Waterfall JJ, Lis JT. Nascent RNA sequencing reveals widespread pausing and divergent initiation at human promoters. <i>Science</i> 2008 Dec 19;322(5909):1845-8. PMID: 19056941                                                                                                  |
| LNCaP                        | GSE 47807                                         | Yang et al. Yang L, Lin C, Jin C, Yang JC, Tanasa B, Li W, Merkurjev D, Ohgi KA, Meng D, Zhang J, Evans CP, Rosenfeld MG. <i>Nature</i> . 2013 Aug 29;500(7464):598-602.doi:10.1038/nature12451.Epub 2013 Aug 14.PMID: 23945587                                                            |
| LNCaP                        | GSE27823                                          | Wang D, Garcia-Bassets I, Benner C, Li W et al. Reprogramming transcription by distinct classes of enhancers functionally defined by eRNA. <i>Nature</i> 2011 May 15;474(7351):390-4. PMID: 21572438                                                                                       |
| K562                         | GSE66448                                          | Niskanen EA, Malinen M, Sutinen P, Toropainen S et al. Global SUMOylation on active chromatin is an acute heat stress response restricting transcription. <i>Genome Biol</i> 2015 Jul 28;16:153. PMID: 26259101                                                                            |
| BT474, MCF10, SKBR3, ZR75-30 | E-MTAB-666, E-MTAB-667, E-MTAB-668 and E-MTAB-675 | Kim YJ, Greer CB, Cecchini KR, Harris LN, Tuck DP, Kim TH. HDAC inhibitors induce transcriptional repression of high copy number genes in breast cancer through elongation blockade. <i>Oncogene</i> . 2013 Jun 6;32(23):2828-35. doi: 10.1038/onc.2013.32. Epub 2013 Feb 25.PMID:23435418 |
| GM12004, GM12750             | GSE39878                                          | Wang IX, Core LJ, Kwak H, Brady L et al. RNA-DNA differences are generated in human cells within seconds after RNA exits polymerase II. <i>Cell Rep</i> 2014 Mar 13;6(5):906-15. PMID: 24561252                                                                                            |
| h1ESC                        | GSE41009                                          | Sigova AA, Mullen AC, Molinie B, Gupta S et al. Divergent transcription of long noncoding RNA/mRNA gene pairs in embryonic stem cells. <i>Proc Natl Acad Sci U S A</i> 2013 Feb 19;110(8):2876-81. PMID: 23382218                                                                          |
| HCT116 p53 +/+, p53 -/-      | GSE53964                                          | Allen MA, Andrysik Z, Dengler VL, Mellert HS et al. Global analysis of p53-regulated transcription identifies its direct targets and unexpected regulatory mechanisms. <i>Elife</i> 2014 May 27;3:e02200. PMID: 24867637                                                                   |
| MCF7                         | GSE45822                                          | Li W, Notani D, Ma Q, Tanasa B et al. Functional roles of enhancer RNAs for oestrogen-dependent transcriptional activation. <i>Nature</i> 2013 Jun 27;498(7455):516-20. PMID: 23728302                                                                                                     |

Supplementary table 3 - StarMiR predicted binding sites of sRNA5 in the C-MYC locus

| PROMOTER-5'UTR |               |           |       |                  |                |                 |             |               |
|----------------|---------------|-----------|-------|------------------|----------------|-----------------|-------------|---------------|
| Site ID        | Site_Position | LogitProb | 3'_bp | $\Delta$ Ghybrid | $\Delta$ Gnucl | $\Delta$ Gtotal | Site_Access | Site_Location |
| 1              | 5-16          | 0.527     | 0     | -16.7            | -0.9           | -4.203          | 0.367       | 0.003         |
| 2              | 39-54         | 0.48      | 1     | -18.6            | -0.123         | 0.955           | 0.302       | 0.02          |
| 3              | 90-96         | 0.487     | 1     | -16.4            | -0.068         | -0.081          | 0.168       | 0.045         |
| 4              | 90-99         | 0.519     | 1     | -17.6            | -0.064         | 4.32            | 0.12        | 0.045         |
| 5              | 90-105        | 0.619     | 1     | -18.1            | -0.064         | 13.891          | 0.081       | 0.045         |
| 6              | 150-165       | 0.444     | 0     | -14              | -1.035         | 8.398           | 0.305       | 0.075         |
| 7              | 173-195       | 0.491     | 0     | -13.8            | -0.169         | 8.54            | 0.292       | 0.087         |
| 8              | 219-238       | 0.427     | 0     | -15.8            | -0.9           | -6.438          | 0.503       | 0.11          |
| 9              | 219-232       | 0.449     | 0     | -14.8            | -0.878         | -5.091          | 0.406       | 0.11          |
| 10             | 236-250       | 0.238     | 0     | -15.3            | -0.97          | -11.343         | 0.606       | 0.118         |
| 11             | 309-324       | 0.453     | 1     | -15.2            | -5.214         | -4.102          | 0.598       | 0.155         |
| 12             | 357-382       | 0.402     | 0     | -13.5            | -0.088         | 9.501           | 0.335       | 0.179         |
| 13             | 387-398       | 0.588     | 1     | -16.3            | -0.005         | -0.755          | 0.188       | 0.194         |
| 14             | 435-445       | 0.573     | 1     | -18.3            | -0.671         | -7.051          | 0.335       | 0.218         |
| 15             | 435-452       | 0.542     | 1     | -20.1            | -0.671         | -6.323          | 0.403       | 0.218         |
| 16             | 463-479       | 0.431     | 0     | -15.3            | -1.716         | -7.364          | 0.437       | 0.232         |
| 17             | 567-582       | 0.523     | 0     | -10.4            | -0.207         | -3.283          | 0.402       | 0.284         |
| 18             | 595-607       | 0.608     | 0     | -16.3            | -0.561         | -4.918          | 0.305       | 0.298         |
| 19             | 649-660       | 0.581     | 1     | -15.5            | -0.386         | -6.773          | 0.438       | 0.325         |
| 20             | 649-664       | 0.564     | 1     | -15.8            | -0.386         | -4.161          | 0.415       | 0.325         |
| 21             | 678-688       | 0.613     | 0     | -17.9            | -0.956         | -9.018          | 0.362       | 0.339         |
| 22             | 678-685       | 0.596     | 0     | -17.2            | -0.956         | -8.83           | 0.414       | 0.339         |
| 23             | 818-827       | 0.569     | 0     | -12.1            | -3.979         | -7.765          | 0.465       | 0.409         |
| 24             | 826-834       | 0.715     | 0     | -16.8            | -0.029         | -3.104          | 0.159       | 0.413         |
| 25             | 907-920       | 0.477     | 1     | -15.1            | -0.005         | 9.601           | 0.075       | 0.454         |
| 26             | 907-925       | 0.419     | 1     | -15.3            | -0.005         | 12.144          | 0.111       | 0.454         |
| 27             | 924-939       | 0.452     | 0     | -17.1            | -0.014         | 5.92            | 0.2         | 0.462         |
| 28             | 1002-1009     | 0.669     | 0     | -19.9            | -6.141         | -12.928         | 0.608       | 0.501         |
| 29             | 1002-1016     | 0.604     | 0     | -21.9            | -6.256         | -12.146         | 0.481       | 0.501         |
| 30             | 1002-1013     | 0.62      | 0     | -19.9            | -6.141         | -11.534         | 0.551       | 0.501         |
| 31             | 1020-1048     | 0.499     | 0     | -13.8            | -2.564         | 4.379           | 0.491       | 0.51          |
| 32             | 1020-1051     | 0.486     | 0     | -13.9            | -2.564         | 7.201           | 0.467       | 0.51          |
| 33             | 1025-1033     | 0.608     | 0     | -15.3            | -0.274         | -5.849          | 0.445       | 0.513         |
| 34             | 1025-1036     | 0.612     | 0     | -17.6            | -0.312         | -4.193          | 0.348       | 0.513         |
| 35             | 1150-1163     | 0.44      | 0     | -15.8            | 0              | 9.127           | 0.188       | 0.575         |
| 36             | 1156-1180     | 0.494     | 0     | -16.6            | -0.643         | -0.486          | 0.422       | 0.578         |
| 37             | 1358-1375     | 0.598     | 1     | -12.9            | -0.699         | 8.122           | 0.179       | 0.679         |
| 38             | 1358-1378     | 0.577     | 1     | -14              | -0.696         | 10.265          | 0.155       | 0.679         |
| 39             | 1452-1466     | 0.63      | 1     | -15.5            | -1.778         | -2.436          | 0.521       | 0.726         |
| 40             | 1573-1587     | 0.397     | 0     | -15.6            | -0.026         | -0.954          | 0.231       | 0.787         |
| 41             | 1586-1604     | 0.261     | 0     | -16.7            | -0.01          | 11.65           | 0.196       | 0.793         |
| 42             | 1660-1681     | 0.708     | 0     | -17.7            | -0.022         | -9.387          | 0.553       | 0.83          |
| 43             | 1660-1675     | 0.758     | 0     | -16.9            | -4.268         | -8.588          | 0.59        | 0.83          |
| 44             | 1691-1700     | 0.76      | 1     | -9.7             | -0.008         | 0.952           | 0.208       | 0.846         |
| 45             | 1741-1748     | 0.613     | 0     | -9.6             | -0.024         | 5.203           | 0.199       | 0.871         |
| 46             | 1775-1791     | 0.64      | 0     | -13.5            | -3.837         | 3.753           | 0.503       | 0.888         |
| 47             | 1795-1813     | 0.614     | 0     | -12.9            | -2.871         | -2.588          | 0.536       | 0.898         |
| 48             | 1837-1843     | 0.662     | 1     | -15.3            | -4.612         | -8.891          | 0.466       | 0.919         |
| 49             | 1837-1850     | 0.494     | 1     | -16.2            | -4.612         | -1.809          | 0.306       | 0.919         |
| 50             | 1837-1847     | 0.525     | 1     | -15.4            | -4.612         | -1.282          | 0.359       | 0.919         |
| 51             | 1892-1908     | 0.688     | 0     | -17.9            | -2.865         | -6.604          | 0.455       | 0.946         |
| 52             | 1892-1906     | 0.619     | 0     | -16.4            | -2.865         | -4.015          | 0.485       | 0.946         |
| 53             | 1960-1976     | 0.629     | 0     | -16              | -3.142         | -0.981          | 0.499       | 0.98          |

  

| CODING SEQUENCE-CDS |               |           |       |                  |                |                 |             |               |
|---------------------|---------------|-----------|-------|------------------|----------------|-----------------|-------------|---------------|
| Site ID             | Site_Position | LogitProb | 3'_bp | $\Delta$ Ghybrid | $\Delta$ Gnucl | $\Delta$ Gtotal | Site_Access | Site_Location |
| 54                  | 2002-2017     | 0.133     | 0     | -16.7            | -0.006         | -7.466          | 0.639       | 0.001         |
| 55                  | 2039-2053     | 0.056     | 0     | -15.8            | -0.04          | 13.035          | 0.067       | 0.007         |
| 56                  | 2065-2074     | 0.16      | 1     | -17.2            | 0              | -4.372          | 0.523       | 0.012         |
| 57                  | 2301-2316     | 0.167     | 0     | -17.3            | -0.023         | 7.703           | 0.195       | 0.056         |
| 58                  | 2326-2338     | 0.292     | 0     | -15.3            | 0              | -4.295          | 0.381       | 0.061         |
| 59                  | 2364-2369     | 0.676     | 1     | -15.8            | -1.781         | -12.639         | 0.556       | 0.068         |
| 60                  | 2364-2376     | 0.459     | 1     | -16.9            | -1.781         | -9.445          | 0.486       | 0.068         |
| 61                  | 2364-2373     | 0.532     | 1     | -16.3            | -1.781         | -9.439          | 0.538       | 0.068         |
| 62                  | 2364-2387     | 0.545     | 1     | -19              | -1.826         | -0.641          | 0.412       | 0.068         |
| 63                  | 2472-2491     | 0.449     | 0     | -16.2            | -0.426         | -5.363          | 0.623       | 0.088         |
| 64                  | 2544-2563     | 0.543     | 0     | -15.1            | -0.025         | -2.531          | 0.482       | 0.102         |
| 65                  | 2560-2574     | 0.793     | 0     | -15.9            | -2.088         | -8.784          | 0.567       | 0.105         |
| 66                  | 2575-2590     | 0.838     | 1     | -14.9            | -4.32          | -9.637          | 0.71        | 0.107         |
| 67                  | 2622-2629     | 0.669     | 1     | -15.8            | -0.013         | -11.626         | 0.609       | 0.116         |
| 68                  | 2622-2636     | 0.461     | 1     | -16.4            | 0              | -0.086          | 0.523       | 0.116         |
| 69                  | 2622-2640     | 0.498     | 1     | -16.7            | 0              | 0.73            | 0.42        | 0.116         |
| 70                  | 2811-2830     | 0.438     | 1     | -17              | -4.615         | -11.343         | 0.606       | 0.151         |
| 71                  | 2875-2888     | 0.388     | 0     | -15.8            | -0.476         | 1.321           | 0.258       | 0.163         |
| 72                  | 2875-2897     | 0.327     | 0     | -16.4            | -0.476         | 10.041          | 0.27        | 0.163         |
| 73                  | 2966-2986     | 0.408     | 0     | -16.1            | -5.512         | 0.603           | 0.385       | 0.18          |
